# Supplementary material for: Formation and functionalization of surface Diels–Alder adducts on ethenylene-bridged periodic mesoporous organosilica
Source: Royal Society of Chemistry journal article supplement (doi:10.1039/c1jm11315a), 2011-01-01
Supplement: c1jm11315a.pdf [file c1jm11315a.pdf]

## SUPPLEMENTARY INFORMATION

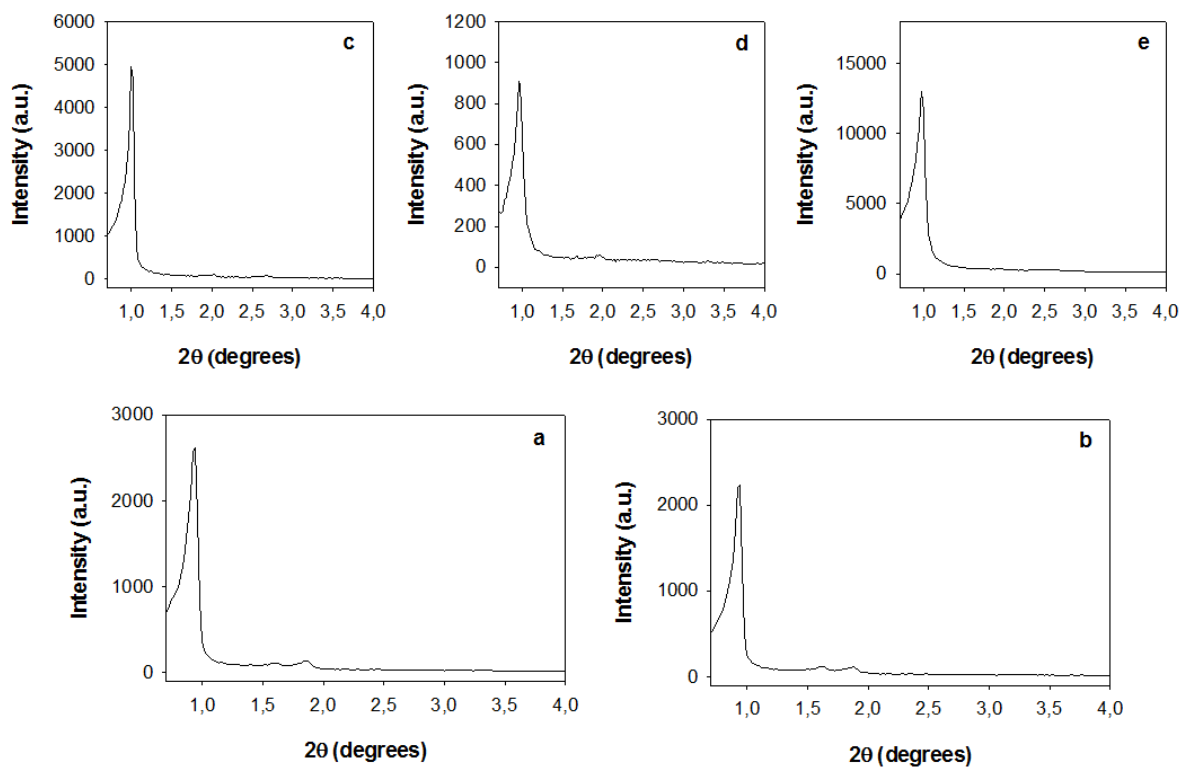

**Fig. S1** XRD patterns of the sulfonated PMOs: (a) CP-e-PMO/SO<sub>3</sub>H(F), (b) BCB-e-PMO/SO<sub>3</sub>H(F), (c) A-e-PMO(2)/SO<sub>3</sub>H(F), (d) A-e-PMO(11)/SO<sub>3</sub>H(F) and (e) A-e-PMO(11)/SO<sub>3</sub>H(C).

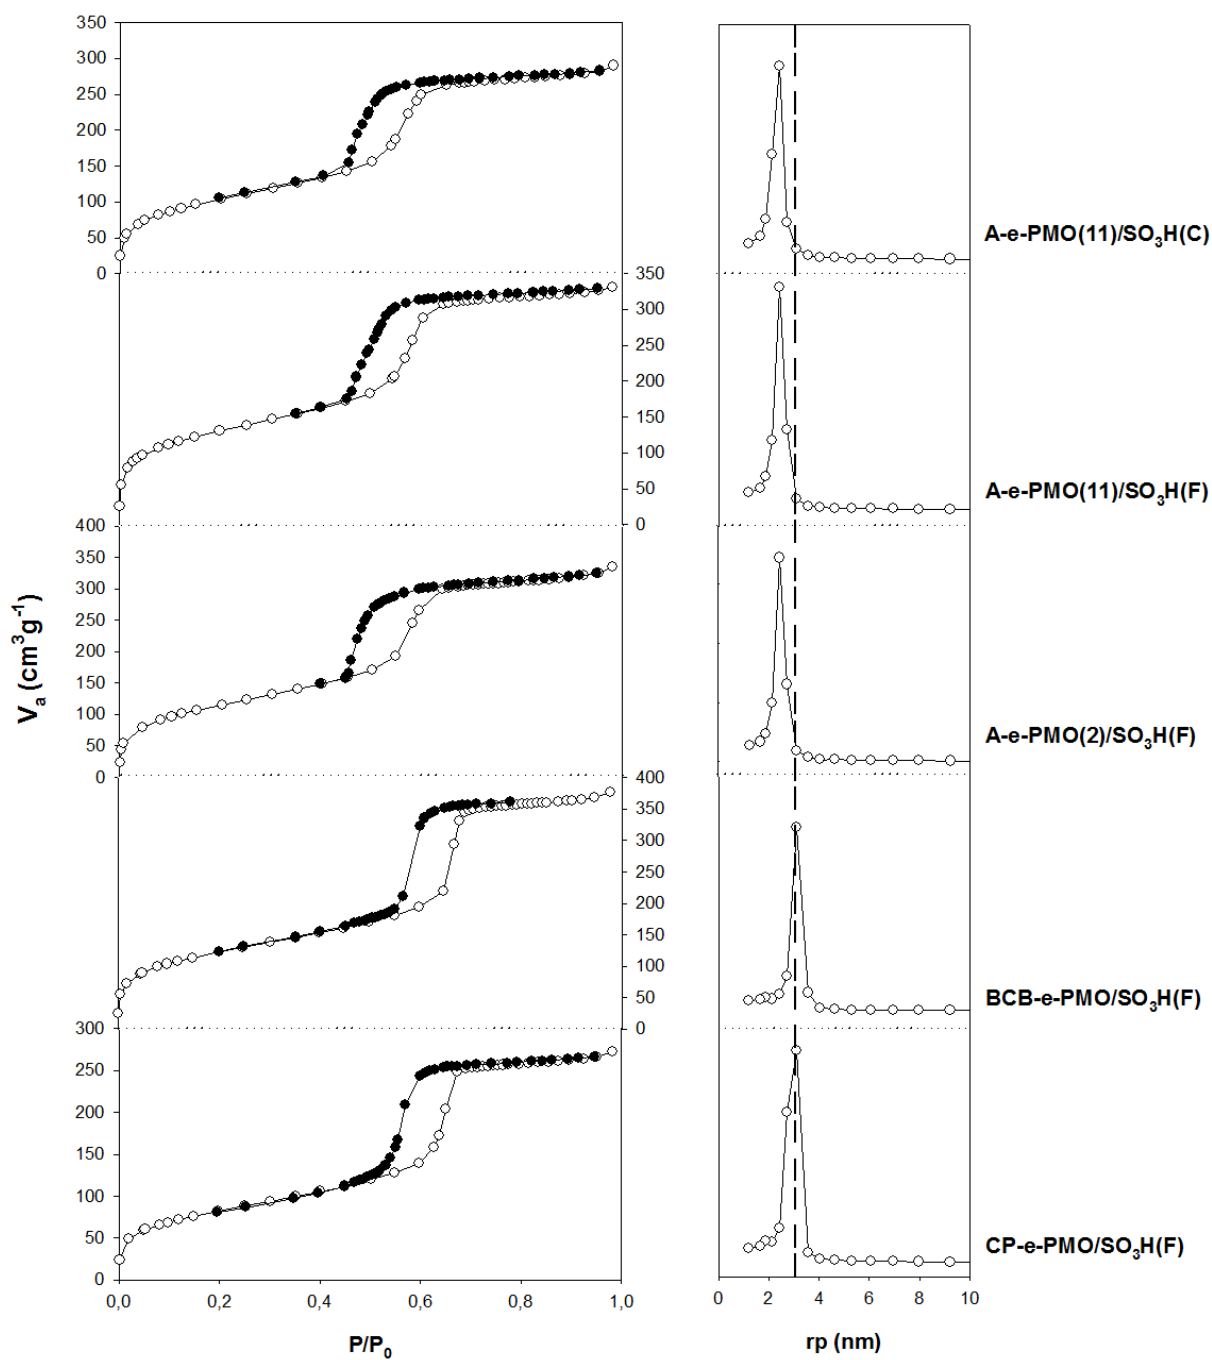

**Fig. S2** Nitrogen adsorption-desorption isotherms (left) and pore size distribution curves (right) of sulfonated PMOs.
